# Supplementary material
Source: PubMed Central journal article supplement (PMC3437879)
Supplement: 1209945109_pnas.1209945109_SI.pdf [file 1209945109_pnas.1209945109_SI.pdf]

# Supporting Information

Butterfoss et al. 10.1073/pnas.1209945109

## Other supporting Information Files

[Dataset S1 \(TXT\)](#)

[Dataset S2 \(TXT\)](#)
